# Supplementary material
Source: ML conference proceedings conference paper supplement (https://www.ecva.net/papers/eccv_2020/papers_ECCV/html/123710188_ECCV_2020_paper.php)
Supplement: Supplementary file 1 [file 123710188-supp.pdf]

# Prediction and Recovery for Adaptive Low-Resolution Person Re-Identification

Ke Han<sup>1,2</sup>, Yan Huang<sup>1</sup>, Zerui Chen<sup>1</sup>, Liang Wang<sup>1,3,4</sup>, and Tieniu Tan<sup>1,3</sup>

<sup>1</sup> Center for Research on Intelligent Perception and Computing (CRIPAC),  
National Laboratory of Pattern Recognition (NLPR),  
Institute of Automation, Chinese Academy of Sciences (CASIA)

<sup>2</sup> School of Future Technology, University of Chinese Academy of Sciences (UCAS)

<sup>3</sup> Center for Excellence in Brain Science and Intelligence Technology (CEBSIT)

<sup>4</sup> Chinese Academy of Sciences, Artificial Intelligence Research (CAS-AIR)

{ke.han,zerui.chen}@cripac.ia.ac.cn, {yhuang,wangliang,tnt}@nlpr.ia.ac.cn

## 1 Supplementary Material

**Scale factor setting.** Presetting proper alternative scale factors carries a higher chance of finding out the optimal scale factor. A proper presetting should contain multiple scale factors, including the smaller scale factors that keep the original information better, and the larger ones that recover more missing details. However, simply increasing the number of scale factors does not always benefit the performances. As shown in Table 1, presetting alternative scale factors to 1, 2, 3, 4 achieves competitive results on MLR-CUHK03 and MLR-DukeMTMC-reid. The reason why additionally using 5 or 6 has little effect, or even degenerates the performances is two-fold. First, 5 and 6 are larger scale factors and easily bring excessive disruptive noise to the recovered images. Besides, more scale factors make it more difficult to choose a suitable one from them. Therefore, we can see that both too many and too few alternative scale factors may limit the performances, in which case four scale factors 1, 2, 3, 4 are a suitable setting.

**Table 1.** Rank 1 scores of different scale factor settings (%).

| Scale factor setting | MLR-CUHK03 | MLR-DukeMTMC-reid |
|----------------------|------------|-------------------|
| 1                    | 76.8       | 71.2              |
| 1,2                  | 80.1       | 75.6              |
| 1,2,3                | 82.3       | 76.8              |
| 1,2,3,4              | 85.2       | 78.3              |
| 1,2,3,4,5            | 84.9       | 78.5              |
| 1,2,3,4,5,6          | 83.7       | 77.6              |

**Weight factors.** We evaluate the weight factors  $\alpha$  and  $\beta$  of the identity loss  $L_{id}$  and triplet loss  $L_{tri}$  in Equation 6 of the main paper. As shown in Figure 1,  $\alpha$  or  $\beta$  has the similar changing trend in terms of the rank 1 score on MLR-CUHK03 and MLR-DukeMTMC-reid. For example, the rank 1 reaches the top value when

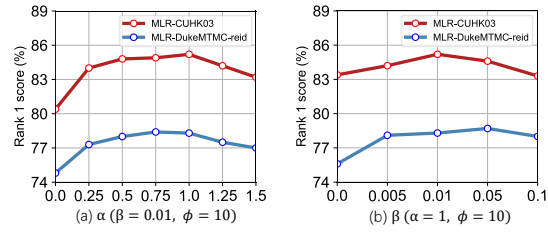

**Fig. 1.** Evaluation of weight factors.

$\alpha$  is around 1, *i.e.*, giving similar weights to the SR loss  $L_{sr}$  and identity loss  $L_{id}$ . This shows that learning the effective detail recovery ( $L_{sr}$ ) and identity discrimination ( $L_{id}$ ) are nearly equally important to LR re-id.
